# Supplementary material for: Keggin type transition metal substituted phosphomolybdates: heterogeneous catalysts for selective aerobic oxidation of alcohols and alkenes under solvent free condition
Source: Royal Society of Chemistry journal article supplement (doi:10.1039/c3cy00717k), 2013-10-24
Supplement: c3cy00717k.pdf [file c3cy00717k.pdf]

# Keggin type transition metal substituted phosphomolybdates: Heterogeneous catalysts for selective aerobic oxidation of alcohols and alkenes under solvent free condition

Soyeb Pathan<sup>a</sup>, Anjali Patel<sup>\*a</sup>

Polyoxometalates and Catalysis Laboratory, Department of Chemistry, Faculty of Science, The M. S. University of Baroda, Vadodara 390 002, India;

E-mail: aupatel\_chem@yahoo.com

## Aerobic oxidation of styrene over $\text{PMo}_{11}\text{M}$ (M=Co, Mn, Ni)

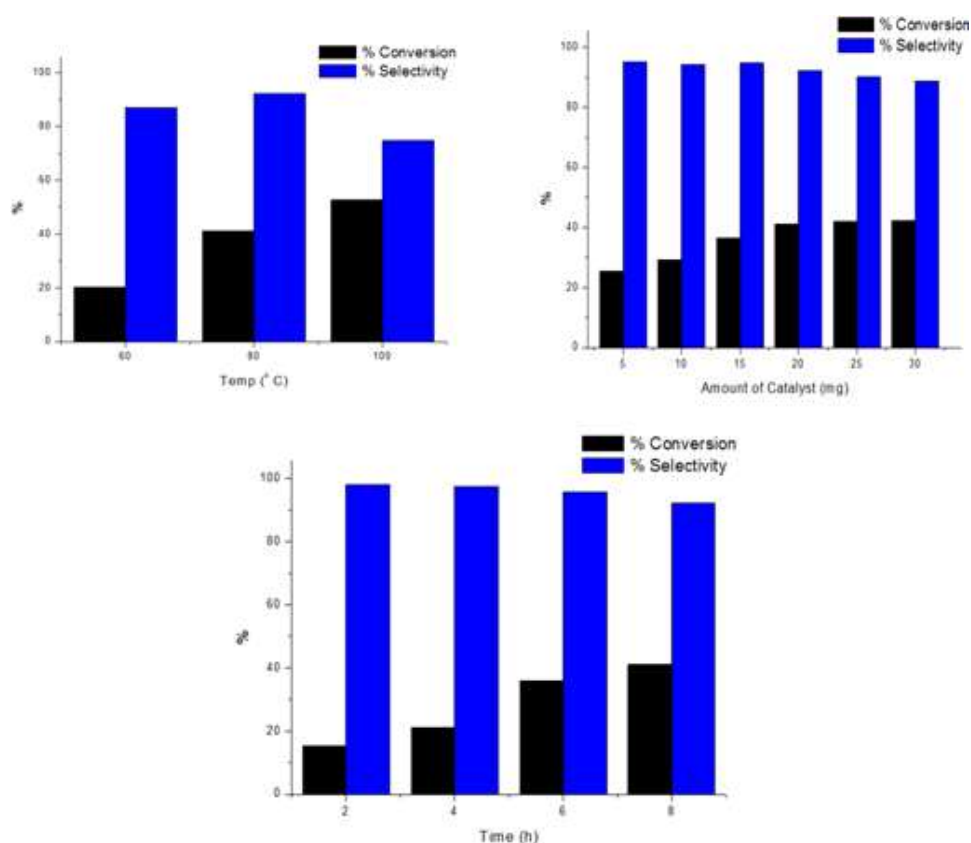

**Fig. S1** Optimization of reaction conditions for aerobic oxidation of styrene over  $\text{PMo}_{11}\text{Co}$

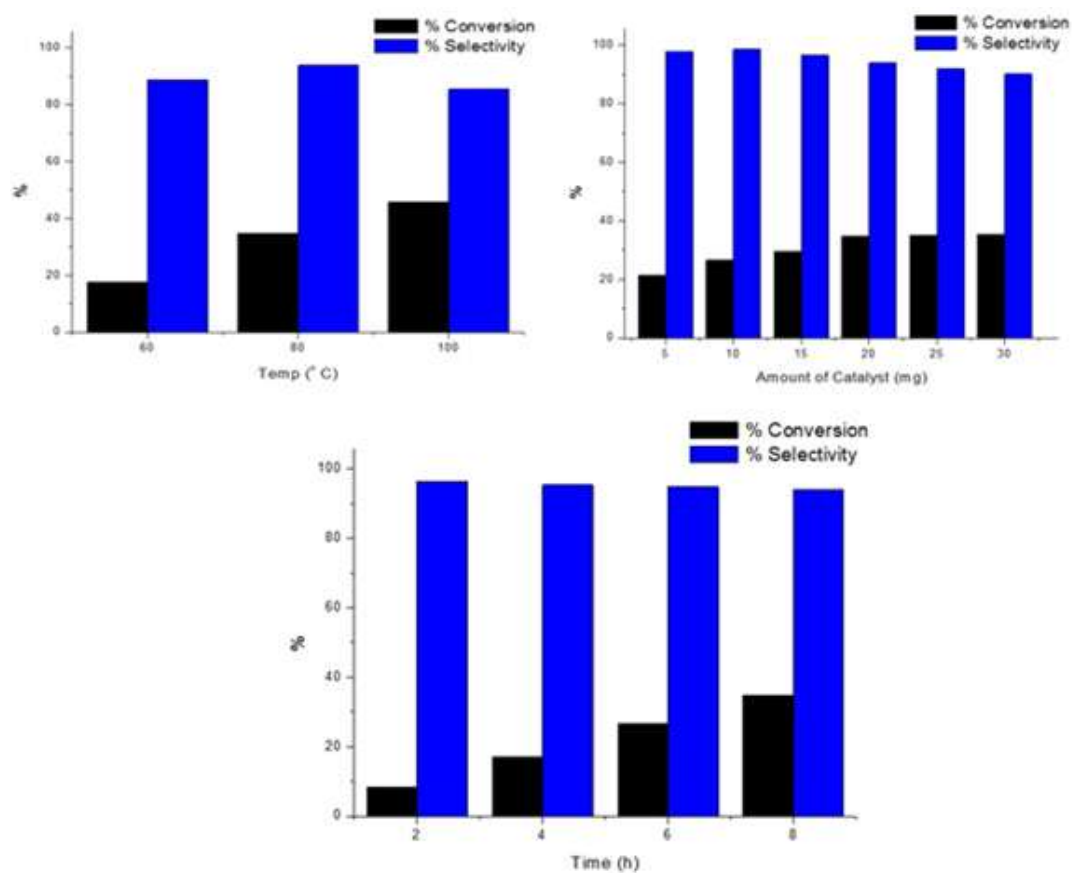

**Fig. S2** Optimization of reaction conditions for aerobic oxidation of styrene over  $\text{PMo}_{11}\text{Mn}$

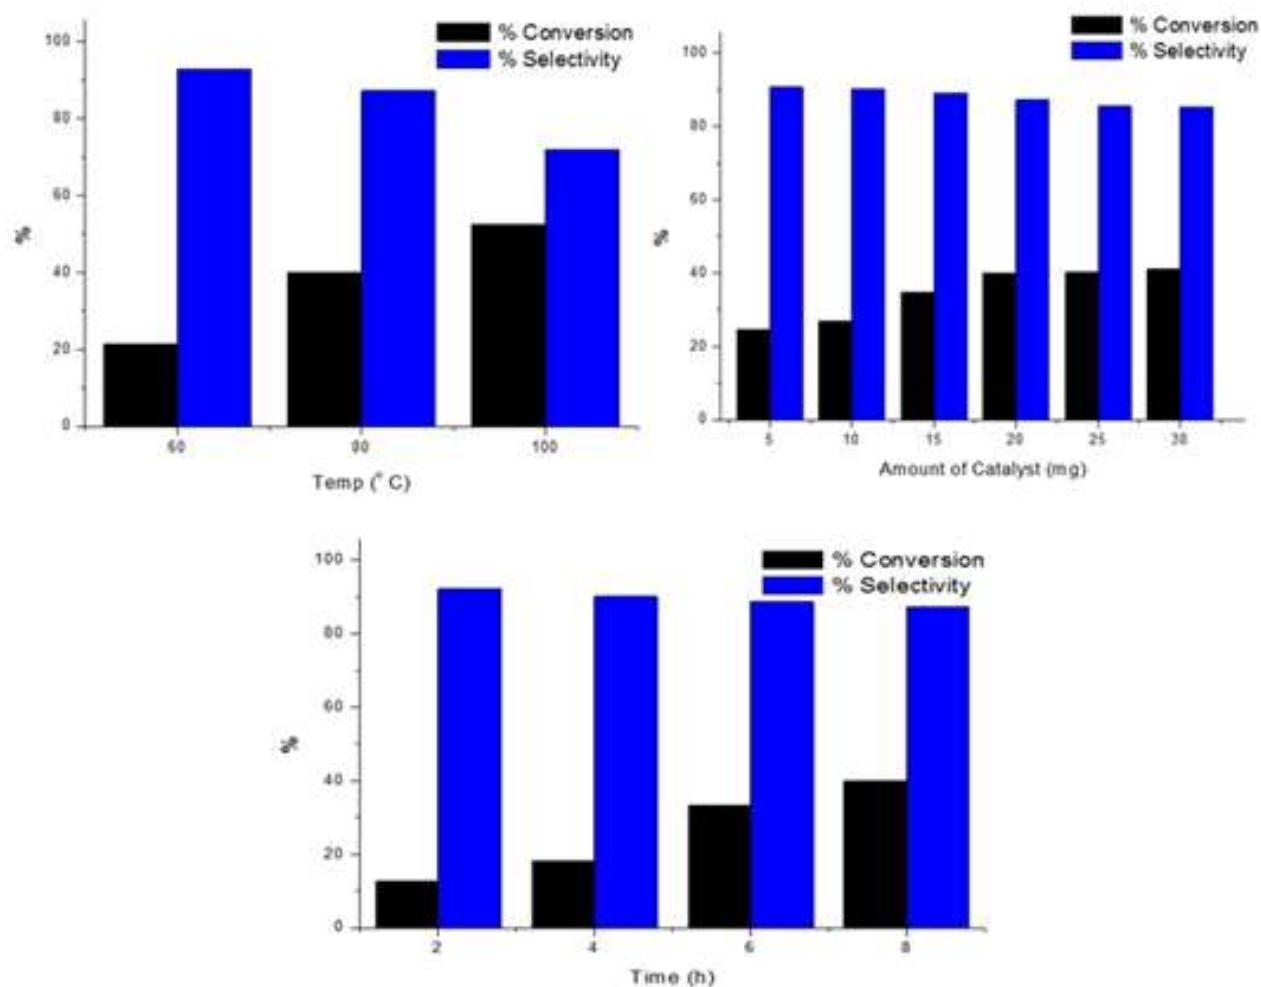

**Fig. S3** Optimization of reaction conditions for aerobic oxidation of styrene over PMo<sub>11</sub>Ni

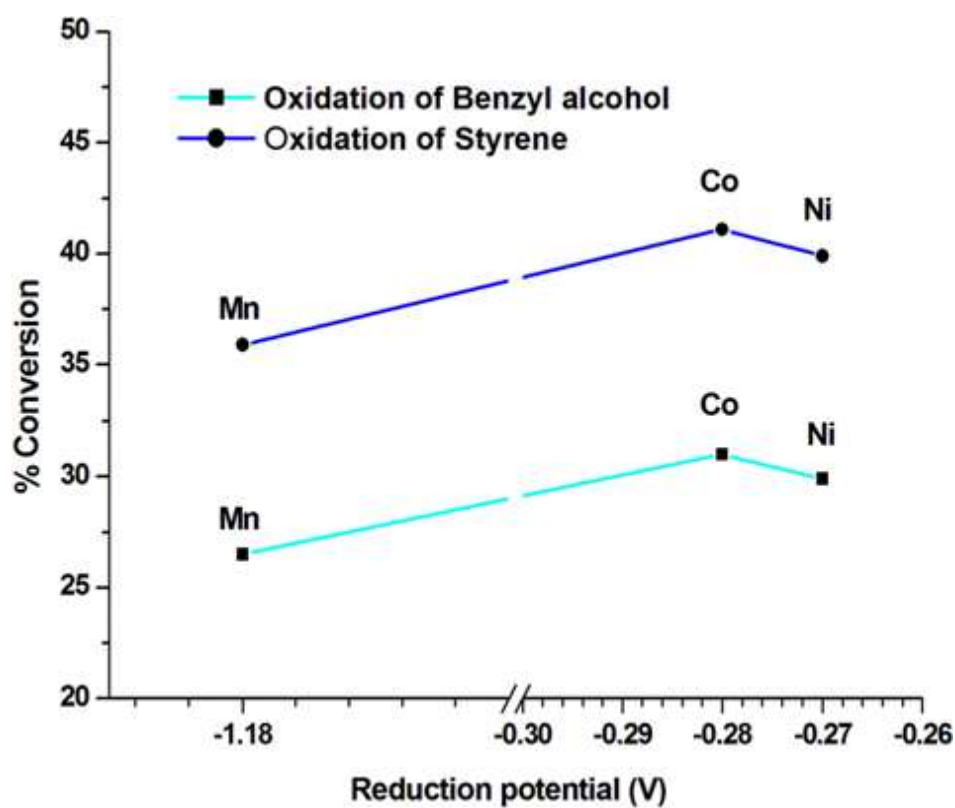

Fig. S4 Conversion with respect to reduction potential of metal

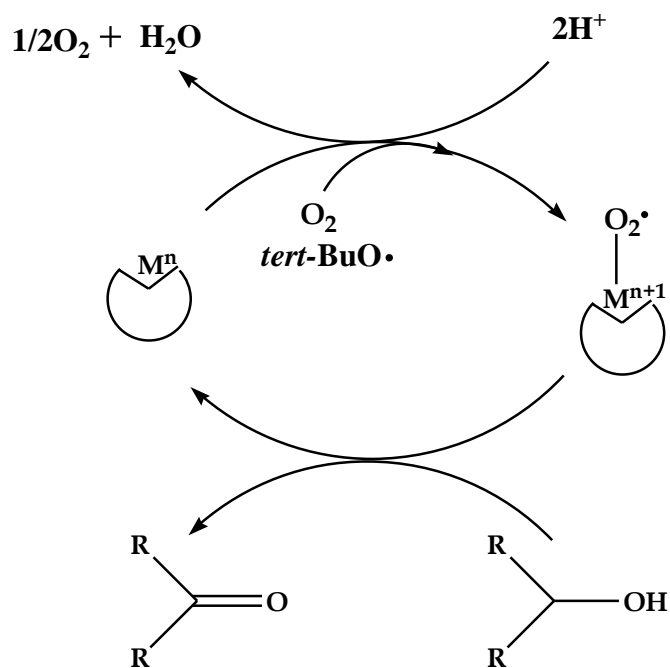

Scheme S1 Proposed reaction mechanism for oxidation of alcohol using O<sub>2</sub>
